# Supplementary material
Source: publisher figshare collection journal article supplement (https://tandf.figshare.com/ndownloader/files/15104138)
Supplement: Supplementary file 1 [file 15104138]

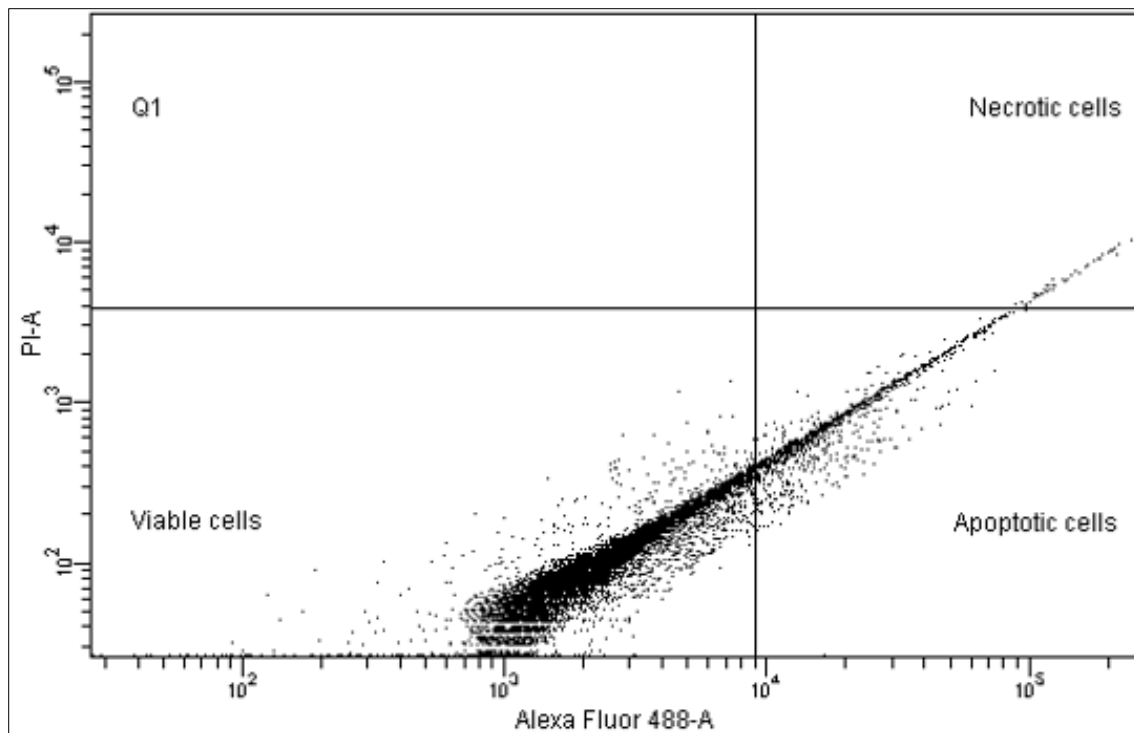

| Population         | #Events | %Total |
|--------------------|---------|--------|
| ■ All Events       | 10,000  | 100.0  |
| ☒ Propidium iodide | 69      | 0.7    |
| ☒ Alexa Fluor 488  | 1,129   | 11.3   |
| ☒ Q1               | 0       | 0.0    |
| ☒ Necrotic cells   | 66      | 0.7    |
| ☒ Viable cells     | 8,792   | 87.9   |
| ☒ Apoptotic cells  | 1,142   | 11.4   |

**Fig1. Apoptotic and necrotic cells via flow cytometer after 48 h incubation with Naked ASH2L siRNA (2,85 µg)**

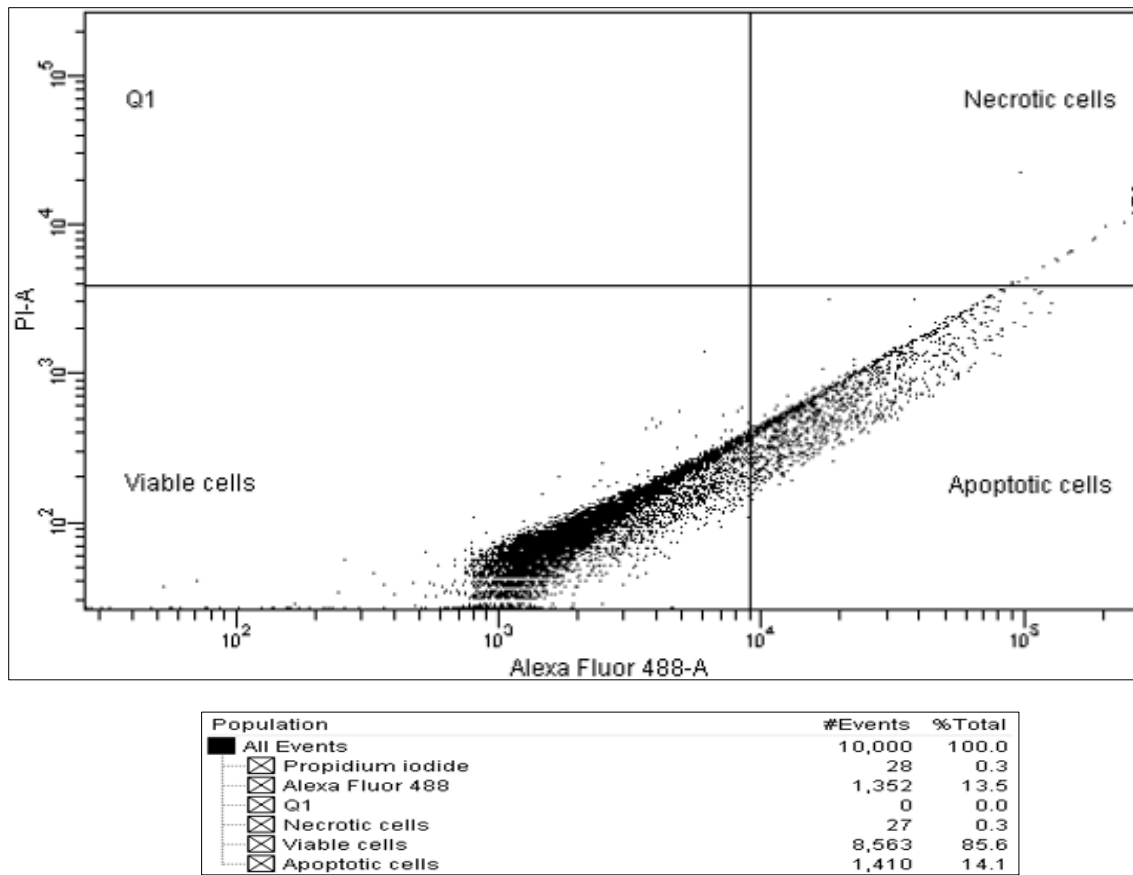

**Fig2. Apoptotic and necrotic cells via flow cytometer after 48 h incubation with Naked ASH2L siRNA (5,7 µg)**

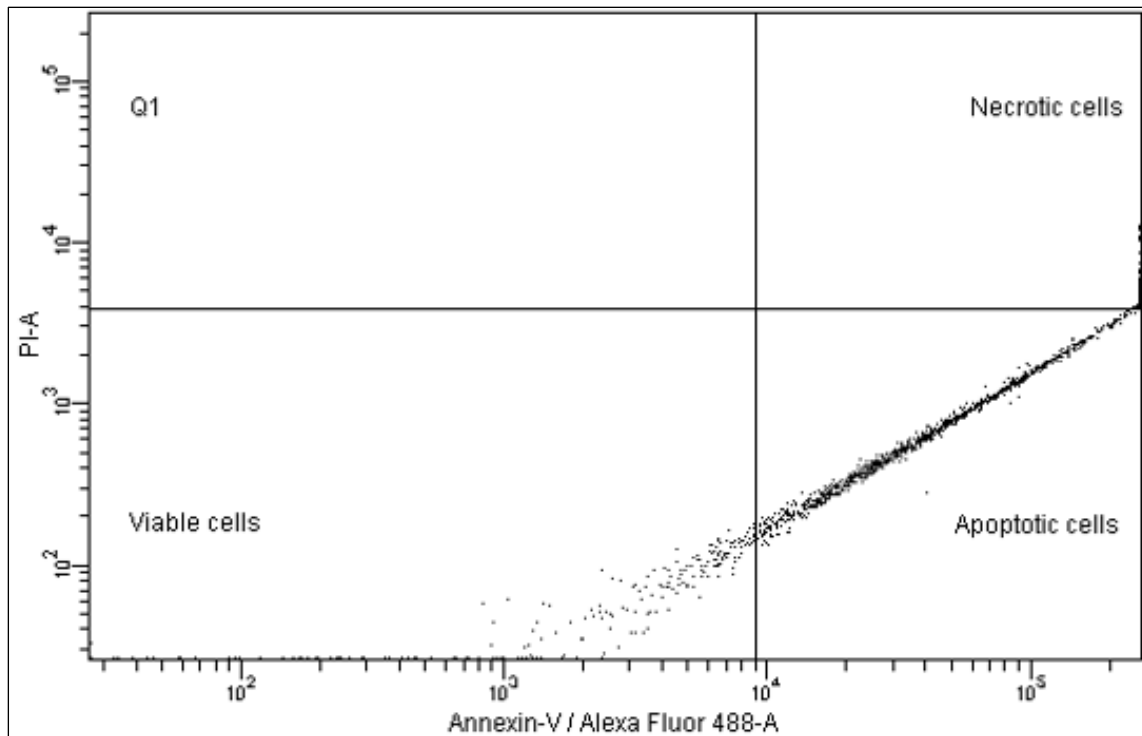

| Population         | #Events | %Total |
|--------------------|---------|--------|
| ■ All Events       | 1,419   | 100.0  |
| ☒ Propidium iodide | 60      | 4.2    |
| ☒ Alexa Fluor 488  | 1,102   | 77.7   |
| ☒ Q1               | 0       | 0.0    |
| ☒ Necrotic cells   | 60      | 4.2    |
| ☒ Viable cells     | 249     | 17.5   |
| ☒ Apoptotic cells  | 1,110   | 78.2   |

**Fig3. Apoptotic and necrotic cells via flow cytometer after 48 h incubation with ASH2L siRNA-NPs (2,85 µg)**

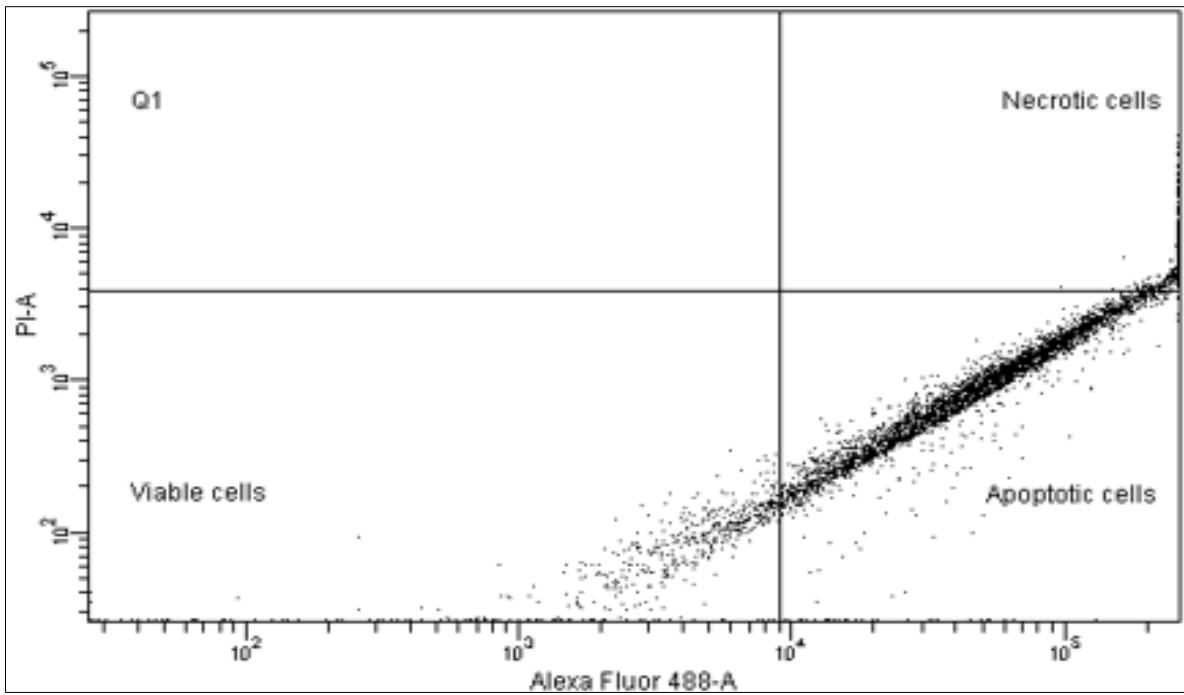

| Population         | #Events | %Total |
|--------------------|---------|--------|
| ■ All Events       | 5,039   | 100.0  |
| ☒ Propidium iodide | 413     | 8.2    |
| ☒ Alexa Fluor 488  | 3,955   | 78.5   |
| ☒ Q1               | 0       | 0.0    |
| ☒ Necrotic cells   | 403     | 8.0    |
| ☒ Viable cells     | 746     | 14.8   |
| ☒ Apoptotic cells  | 3,890   | 77.2   |

**Fig4. Apoptotic and necrotic cells via flow cytometer after 48 h incubation with ASH2L siRNA NPs (5,7 µg)**

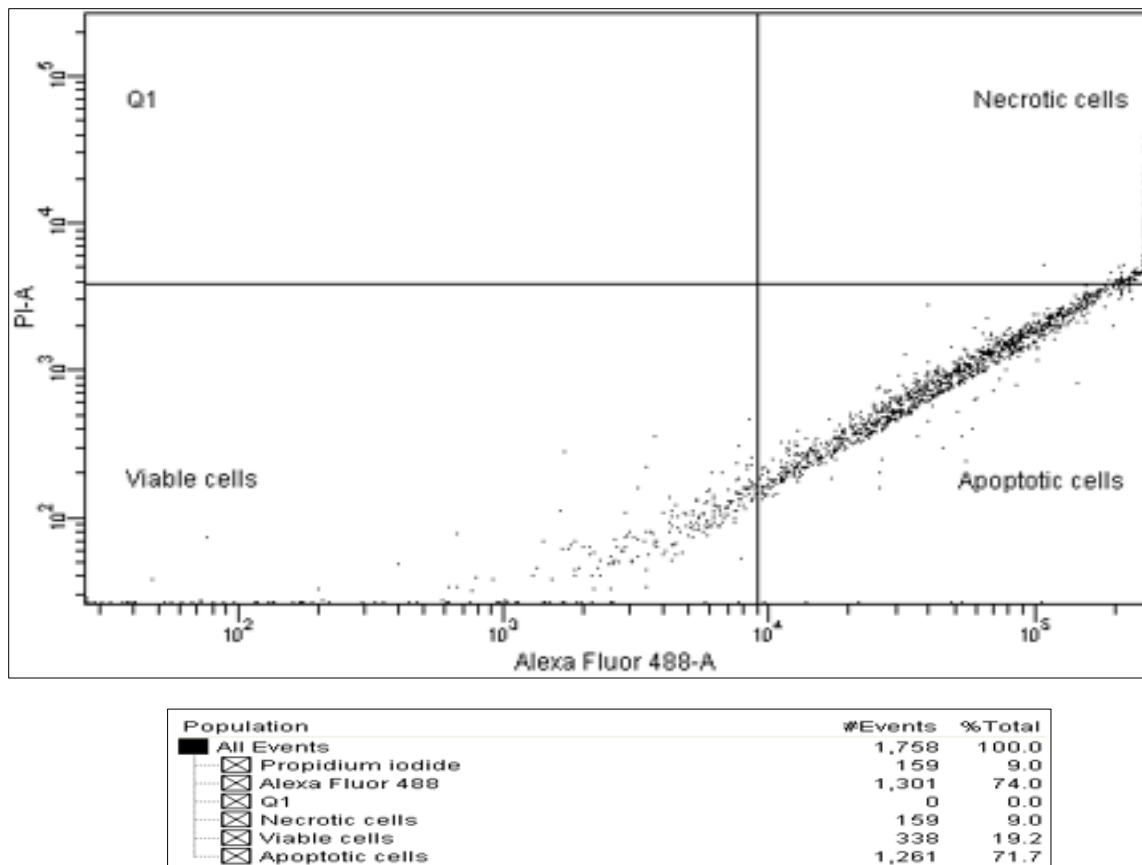

**Fig5. Apoptotic and necrotic cells via flow cytometer after 48 h incubation with HiPerFect ASH2L siRNA (2,85 µg)**

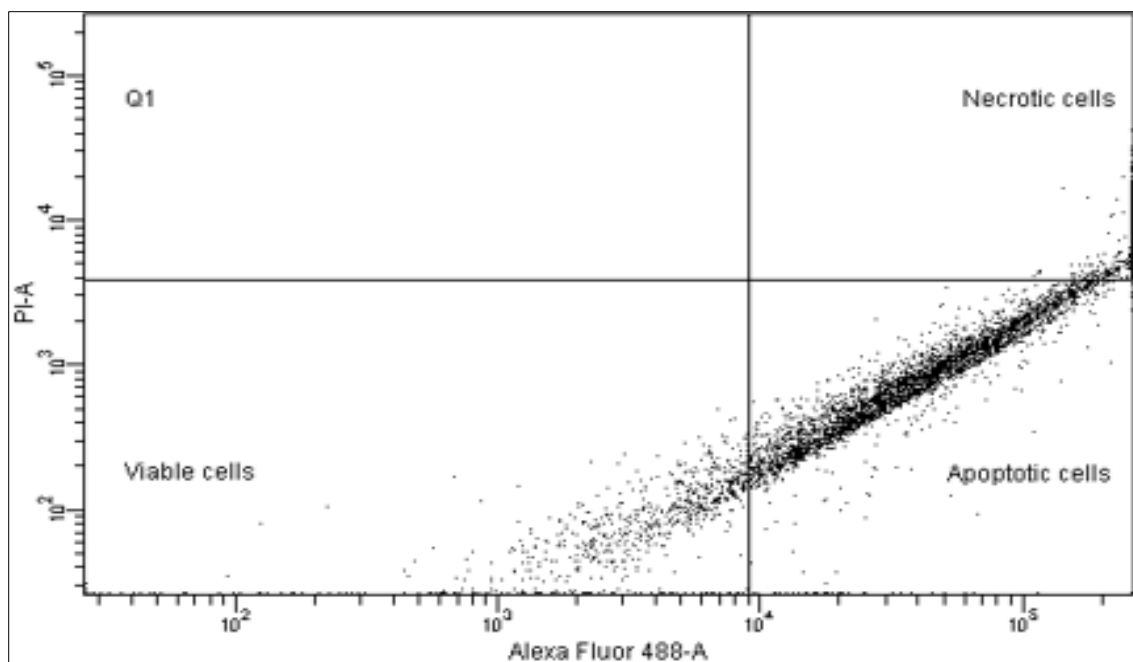

| Population         | #Events | %Total |
|--------------------|---------|--------|
| ■ All Events       | 5,021   | 100.0  |
| ▣ Propidium iodide | 338     | 6.7    |
| ▣ Alexa Fluor 488  | 3,904   | 77.8   |
| ▣ Q1               | 0       | 0.0    |
| ▣ Necrotic cells   | 332     | 6.6    |
| ▣ Viable cells     | 856     | 17.0   |
| ▣ Apoptotic cells  | 3,833   | 76.3   |

**Fig6. Apoptotic and necrotic cells via flow cytometer after 48 h incubation with HiPerFect ASH2L siRNA (5,7 µg)**

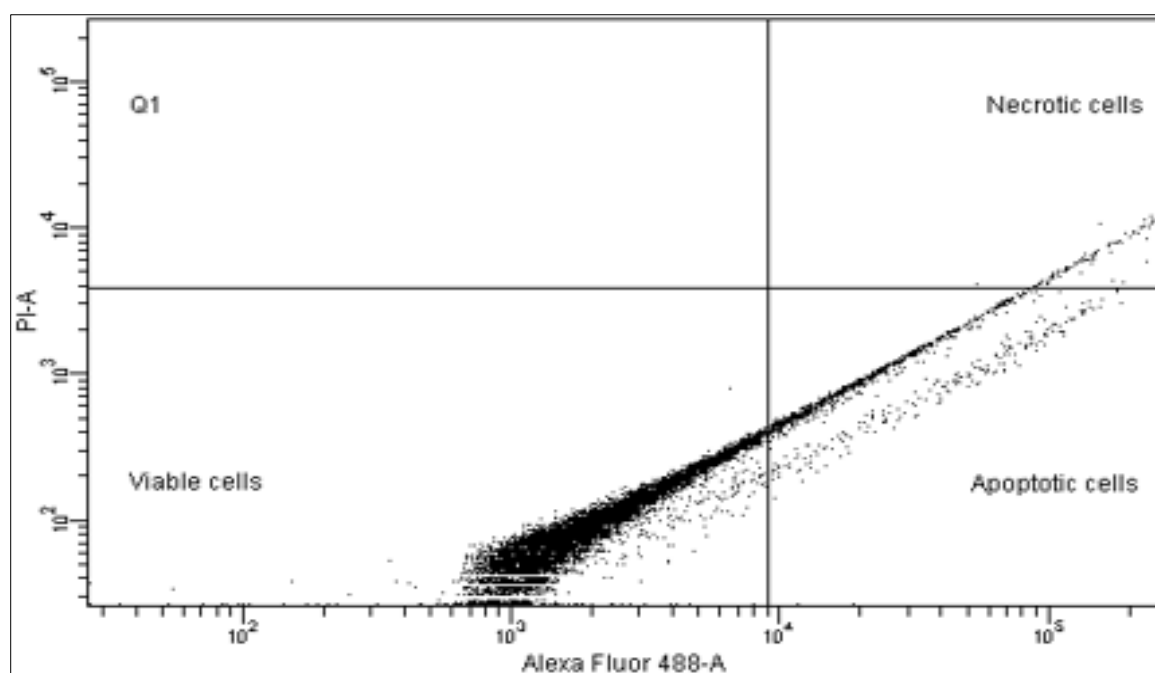

| Population       | #Events | %Total |
|------------------|---------|--------|
| All Events       | 10,000  | 100.0  |
| Propidium iodide | 142     | 1.4    |
| Alexa Fluor 488  | 1,190   | 11.9   |
| Q1               | 0       | 0.0    |
| Necrotic cells   | 141     | 1.4    |
| Viable cells     | 8,710   | 87.1   |
| Apoptotic cells  | 1,149   | 11.5   |

Fig7. Apoptotic and necrotic cells via flow cytometer after 48 h incubation with Naked CK2 siRNA (2,85 µg)

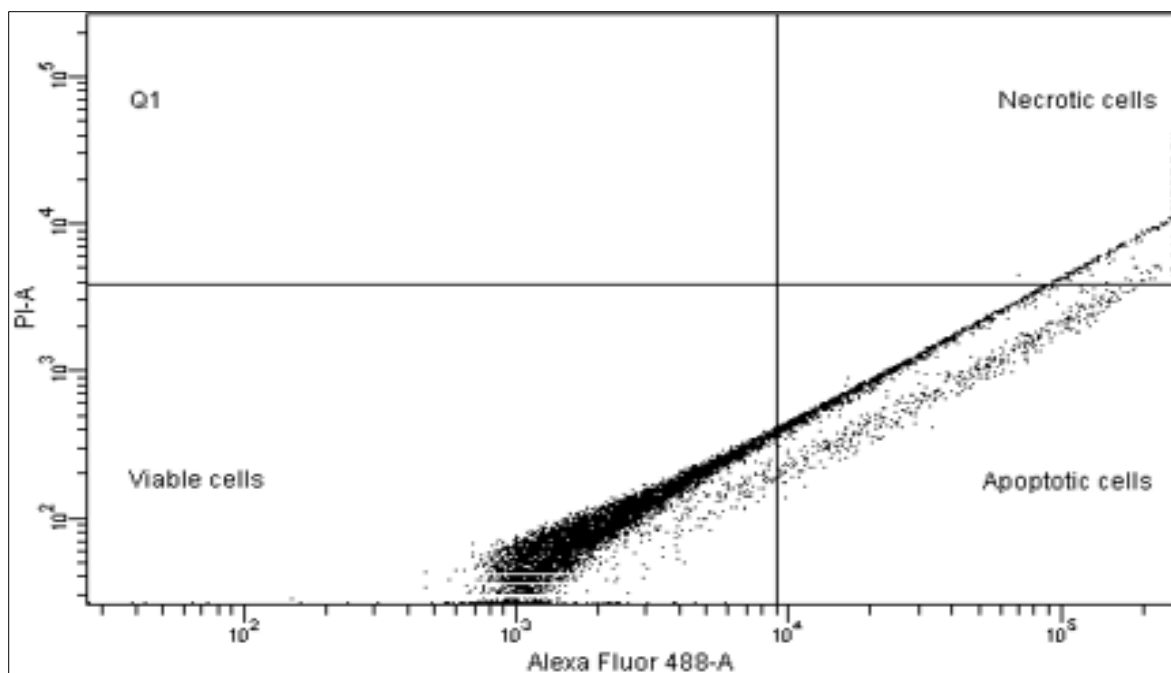

| Population         | #Events | %Total |
|--------------------|---------|--------|
| ■ All Events       | 10,000  | 100.0  |
| ☒ Propidium iodide | 230     | 2.3    |
| ☒ Alexa Fluor 488  | 1,867   | 18.7   |
| ☒ Q1               | 0       | 0.0    |
| ☒ Necrotic cells   | 222     | 2.2    |
| ☒ Viable cells     | 8,004   | 80.0   |
| ☒ Apoptotic cells  | 1,774   | 17.7   |

**Fig8. Apoptotic and necrotic cells via flow cytometer after 48 h incubation with Naked CK2 siRNA (5,7 µg)**



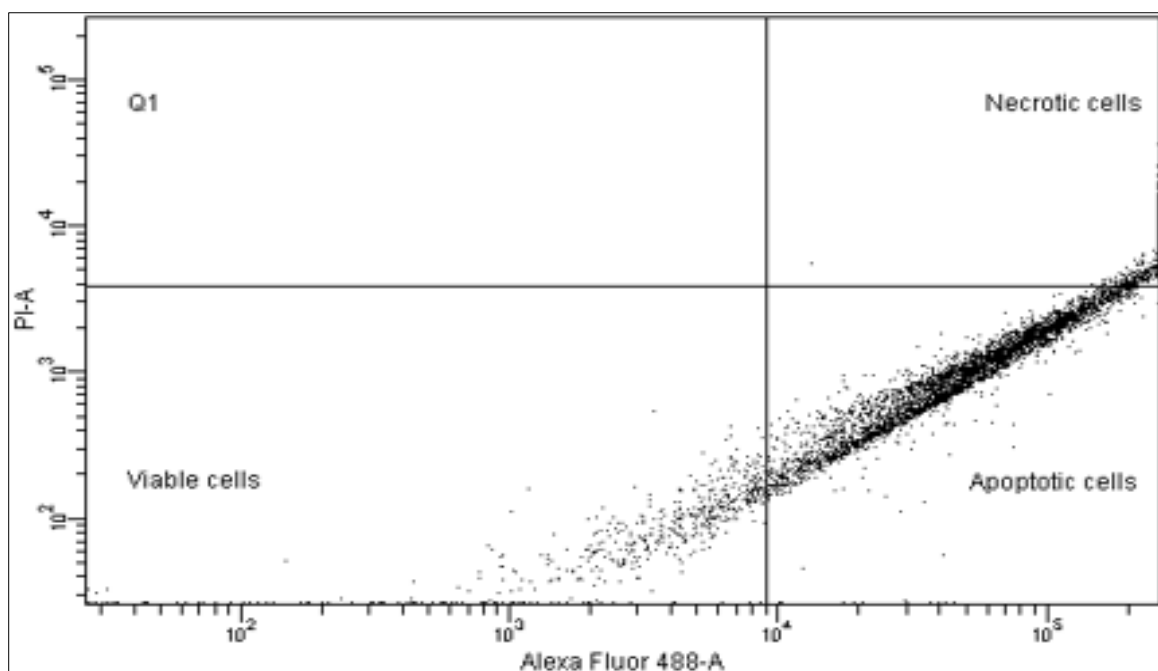

| Population         | #Events | %Total |
|--------------------|---------|--------|
| ■ All Events       | 5,064   | 100.0  |
| ▣ Propidium iodide | 553     | 10.9   |
| ▣ Alexa Fluor 488  | 4,039   | 79.8   |
| ▣ Q1               | 0       | 0.0    |
| ▣ Necrotic cells   | 545     | 10.8   |
| ▣ Viable cells     | 624     | 12.3   |
| ▣ Apoptotic cells  | 3,895   | 76.9   |

Fig9. Apoptotic and necrotic cells via flow cytometer after 48 h incubation with CK2 siRNA NPs (2,85 µg)

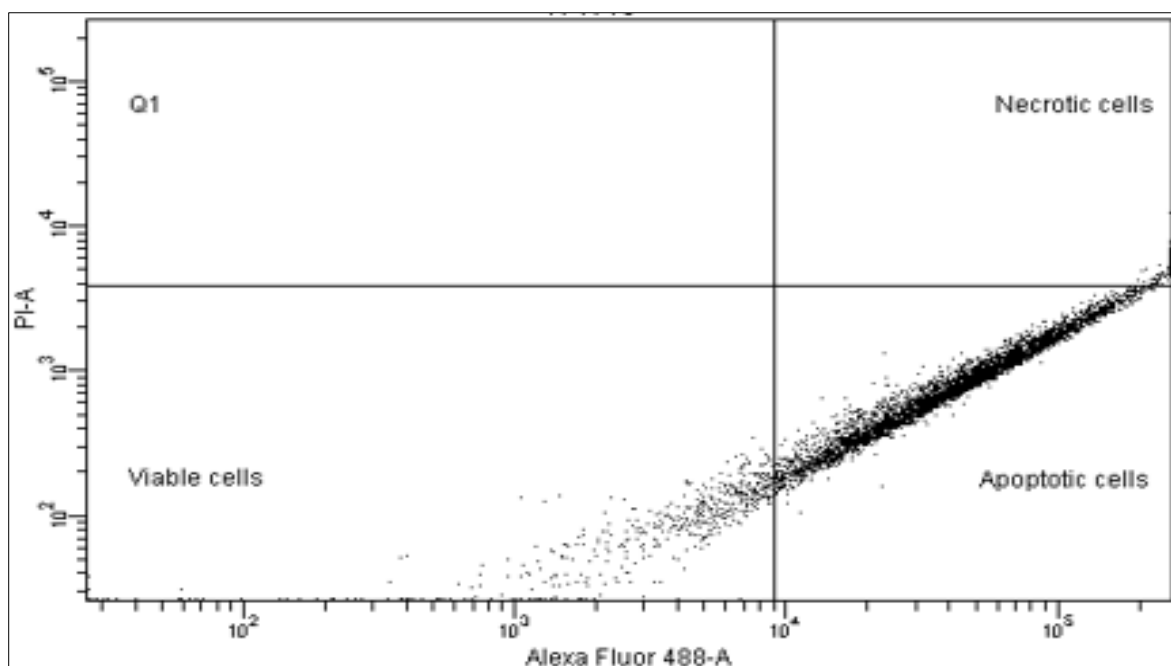

| Population       | #Events | %Total |
|------------------|---------|--------|
| All Events       | 5,038   | 100.0  |
| Propidium iodide | 83      | 1.6    |
| Alexa Fluor 488  | 4,404   | 87.4   |
| Q1               | 0       | 0.0    |
| Necrotic cells   | 77      | 1.5    |
| Viable cells     | 562     | 11.2   |
| Apoptotic cells  | 4,399   | 87.3   |

Fig10. Apoptotic and necrotic cells via flow cytometer after 48 h incubation with CK2 siRNA NPs (5,7  $\mu\text{g}$ )

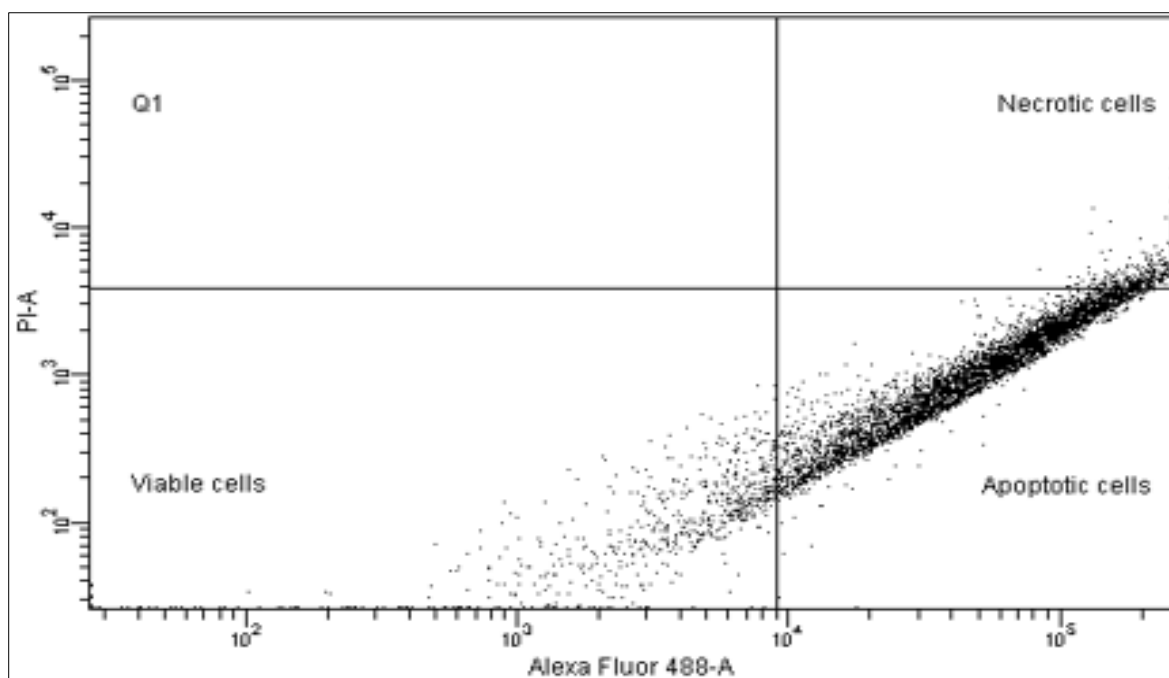

| Population         | #Events | %Total |
|--------------------|---------|--------|
| ■ All Events       | 6,101   | 100.0  |
| ▣ Propidium iodide | 483     | 7.9    |
| ▣ Alexa Fluor 488  | 5,092   | 83.5   |
| ▣ Q1               | 0       | 0.0    |
| ▣ Necrotic cells   | 472     | 7.7    |
| ▣ Viable cells     | 801     | 13.1   |
| ▣ Apoptotic cells  | 4,828   | 79.1   |

**Fig11. Apoptotic and necrotic cells via flow cytometer after 48 h incubation with HiPerFect CK2 siRNA (2,85 µg)**

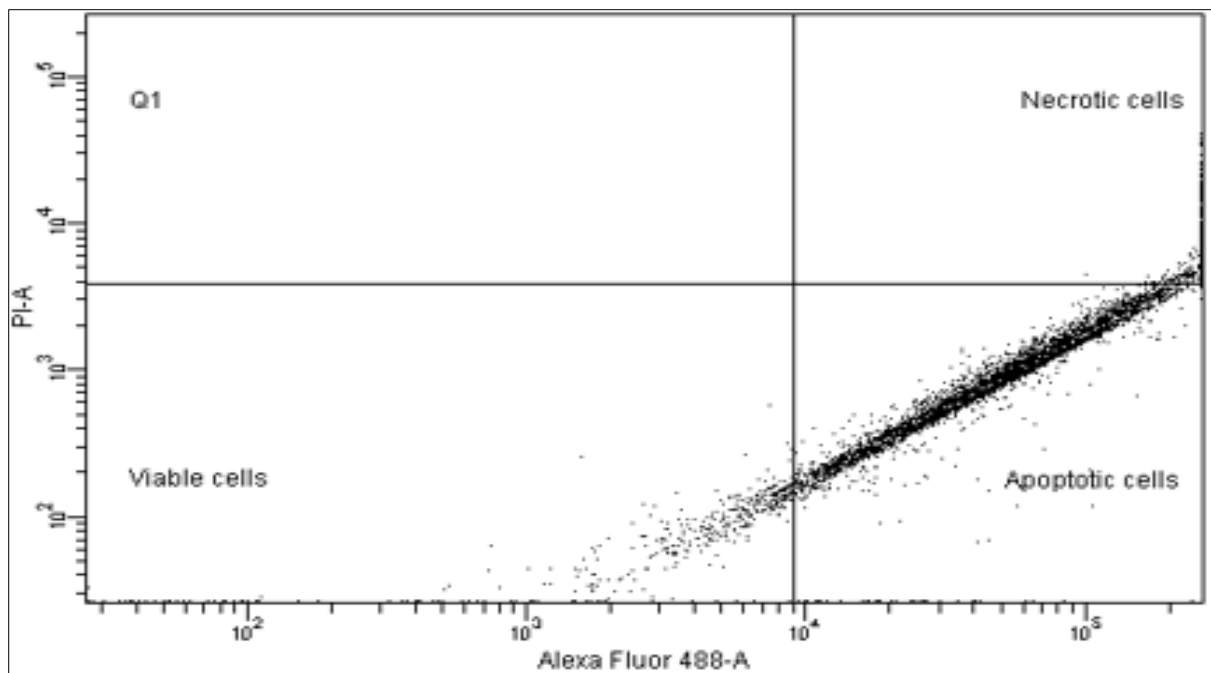

| Population         | #Events | %Total |
|--------------------|---------|--------|
| ■ All Events       | 5,015   | 100.0  |
| ▣ Propidium iodide | 387     | 7.7    |
| ▣ Alexa Fluor 488  | 4,188   | 83.5   |
| ▣ Q1               | 0       | 0.0    |
| ▣ Necrotic cells   | 379     | 7.6    |
| ▣ Viable cells     | 517     | 10.3   |
| ▣ Apoptotic cells  | 4,119   | 82.1   |

**Fig12. Apoptotic and necrotic cells via flow cytometer after 48 h incubation with HiPerFect CK2 siRNA (5,7 µg)**
